# Supplementary material for: Correlation of the leptin:adiponectin ratio with measures of insulin resistance in non-diabetic individuals
Source: PubMed Central journal article supplement — Diabetologia. 2009 Sep 12;52(11):2345–9. doi: 10.1007/s00125-009-1508-3 (PMC2759015; doi:10.1007/s00125-009-1508-3), 2009-09-12
Supplement: 125_2009_1508_MOESM1_ESM.pdf [file 125_2009_1508_MOESM1_ESM.pdf]

## Electronic supplementary material

**ESM Table 1** Body weight categories for men and women from both cohorts

| Category   | Ely ( <i>n</i> =871) |      |          |      | EGIR RISC ( <i>n</i> =1,226) |      |          |      |
|------------|----------------------|------|----------|------|------------------------------|------|----------|------|
|            | Men                  |      | Women    |      | Men                          |      | Women    |      |
|            | <i>n</i>             | %    | <i>n</i> | %    | <i>n</i>                     | %    | <i>n</i> | %    |
| Lean       | 150                  | 42.1 | 284      | 55.2 | 188                          | 35.2 | 418      | 60.4 |
| Overweight | 173                  | 48.6 | 151      | 29.3 | 275                          | 51.5 | 192      | 27.8 |
| Obese      | 33                   | 9.3  | 80       | 15.5 | 71                           | 13.3 | 82       | 11.9 |
