# Supplementary material for: Correlation of the leptin:adiponectin ratio with measures of insulin resistance in non-diabetic individuals
Source: PubMed Central journal article supplement — Diabetologia. 2009 Sep 12;52(11):2345–9. doi: 10.1007/s00125-009-1508-3 (PMC2759015; doi:10.1007/s00125-009-1508-3), 2009-09-12
Supplement: 125_2009_1508_MOESM2_ESM.pdf [file 125_2009_1508_MOESM2_ESM.pdf]

**Electronic supplementary material**

**ESM Table 2** Associations with clamp *M/I* for different predictors of insulin sensitivity (standardised and log-transformed)

| Predictor                   | Lean           |                       | Overweight     |                       | Obese          |                       |
|-----------------------------|----------------|-----------------------|----------------|-----------------------|----------------|-----------------------|
|                             | $\beta$ (SEM)  | <i>p</i> value        | $\beta$ (SEM)  | <i>p</i> value        | $\beta$ (SEM)  | <i>p</i> value        |
| LAR                         | -0.35 (0.036)  | $3.8 \times 10^{-20}$ | -0.59 (0.058)  | $2.9 \times 10^{-22}$ | -0.57 (0.113)  | $1.4 \times 10^{-6}$  |
| HOMA-S                      | -0.27 (0.039)  | $4.8 \times 10^{-12}$ | -0.47 (0.046)  | $5.6 \times 10^{-22}$ | -0.66 (0.073)  | $7.8 \times 10^{-16}$ |
| Fasting insulin             | -0.28 (0.039)  | $7.4 \times 10^{-13}$ | -0.48 (0.046)  | $5.2 \times 10^{-23}$ | -0.66 (0.072)  | $3.1 \times 10^{-16}$ |
| LAR vs HOMA-S <sup>a</sup>  | <i>p</i> =0.19 |                       | <i>p</i> =0.10 |                       | <i>p</i> =0.48 |                       |
| LAR vs insulin <sup>a</sup> | <i>p</i> =0.26 |                       | <i>p</i> =0.13 |                       | <i>p</i> =0.48 |                       |

<sup>a</sup>Significance of differences in associations between predictors and *M/I*
